# Supplementary material for: The development of a Self-Rated ICF-based questionnaire (HEAR-COMMAND Tool) to evaluate Hearing, Communication, and Conversation disability: Multinational experts’ and patients’ perspectives
Source: Frontiers journal article supplement (doi:10.3389/fresc.2022.1005525), 2022-11-14
Supplement: Data_Sheet_1.pdf [file Data_Sheet_1.pdf]

Table 1: The ICF-based developed items of the *HEAR-COMMAND Tool* and the corresponding linked ICF category along with the used resources.

Symbol guidance: ⊕ (Modified item) To develop this item, new words/terms were added to the existing source(s). ⊖ (New item) no reference was used and the question is newly developed. O (Original item) No major change was applied to the existing source(s).

| Body Functions                                                                                                                                      |                                       |                                                   |
|-----------------------------------------------------------------------------------------------------------------------------------------------------|---------------------------------------|---------------------------------------------------|
| Do you have a problem with ...                                                                                                                      |                                       |                                                   |
| b126                                                                                                                                                | Temperament and personality functions | -                                                 |
| ⊖ H.1 changing your attitude or mood when you are in an unpredictable or stressful situation? (Also linked to d240)                                 |                                       |                                                   |
| b134                                                                                                                                                | Sleep functions                       | WHS , Van Leeuwen Tool                            |
| O H.2 sleeping (falling asleep, waking up often during the night, or waking up early in the morning)?                                               |                                       |                                                   |
| b140                                                                                                                                                | Attention functions                   | WHODAS 2.0, SSQ, DHI, Alfakir questionnaire, OQUA |
| ⊕ H.3 focusing your attention on one thing? (Also linked to d160)                                                                                   |                                       |                                                   |
| O H.4 maintaining your focus on two or more things at the same time? (Also linked to d160)                                                          |                                       |                                                   |
| b144                                                                                                                                                | Memory functions                      | WHS, Alfakir questionnaire                        |
| O H.5 remembering things?                                                                                                                           |                                       |                                                   |
| O H.6 recalling new information?                                                                                                                    |                                       |                                                   |
| b152                                                                                                                                                | Emotional functions                   | WHS, DHI, Alfakir questionnaire, OQUA             |
| O H.7 sadness or depression?                                                                                                                        |                                       |                                                   |
| b1560                                                                                                                                               | Auditory perception                   | Alfakir questionnaire                             |
| ⊖ H.21 distinguishing the pitch of sounds?                                                                                                          |                                       |                                                   |
| ⊖ H.22 distinguishing the tone of sounds?                                                                                                           |                                       |                                                   |
| ⊖ H.23 distinguishing the volume of sounds? (Also linked to e2500)                                                                                  |                                       |                                                   |
| ⊕ H.35 understanding the speech of someone you know (your close family members and friends) over distance of two or more meters?                    |                                       |                                                   |
| ⊖ H.36 understanding the speech of someone you know (your close family members and friend) in a quiet environment?                                  |                                       |                                                   |
| ⊕ H.37 understanding the speech of someone you know (your close family members and friend) in a noisy environment? (Also linked to b140/d160/e2501) |                                       |                                                   |
| b167                                                                                                                                                | Mental functions of language          | -                                                 |
| ⊖ H.16 understanding the meaning of a message in your language?                                                                                     |                                       |                                                   |
| ⊖ H.17 producing a meaningful message in your language?                                                                                             |                                       |                                                   |
| b210                                                                                                                                                | Seeing functions                      | WHODAS 2.0                                        |
| O H.8 seeing and recognizing a person you know across the road (with glasses or contact lenses, if necessary)?                                      |                                       |                                                   |
| O H.9 seeing and recognizing an object at arm's length (with glasses or contact lenses, if necessary)?                                              |                                       |                                                   |
| b2300                                                                                                                                               | Sound detection                       | Alfakir questionnaire                             |
| ⊖ H.24 detecting a sound in your surrounding environment?                                                                                           |                                       |                                                   |
| O H.25 detecting noises in the household, like running water or a washing machine?                                                                  |                                       |                                                   |
| b2301                                                                                                                                               | Sound discrimination                  | SSQ, Alfakir questionnaire                        |
| O H.26 discriminating the sound of a car and a bus? (Also linked to b1560)                                                                          |                                       |                                                   |

|                                                                                                                                                                                                                                                                                                                                                                                                                                                                                                                                                                                                                                                                                                                                                                                                                                                                                                                                                                          |                                                             |                                                       |
|--------------------------------------------------------------------------------------------------------------------------------------------------------------------------------------------------------------------------------------------------------------------------------------------------------------------------------------------------------------------------------------------------------------------------------------------------------------------------------------------------------------------------------------------------------------------------------------------------------------------------------------------------------------------------------------------------------------------------------------------------------------------------------------------------------------------------------------------------------------------------------------------------------------------------------------------------------------------------|-------------------------------------------------------------|-------------------------------------------------------|
| <input type="radio"/> <b>H.27</b> recognizing which instruments are playing when you are listening to music? (Also linked to b1560)<br><input type="radio"/> <b>H.34</b> hearing a single jumbled sound when you are hearing more than one sound at the time? (Also linked to b1560)                                                                                                                                                                                                                                                                                                                                                                                                                                                                                                                                                                                                                                                                                     |                                                             |                                                       |
| b2302                                                                                                                                                                                                                                                                                                                                                                                                                                                                                                                                                                                                                                                                                                                                                                                                                                                                                                                                                                    | Localisation of sound source                                | SSQ, AIAHD                                            |
| <input type="radio"/> <b>H.28</b> detecting where a sound comes from?<br><input type="radio"/> <b>H.29</b> telling whether a bus or truck is coming towards you or going away?<br><input type="radio"/> <b>H.30</b> detecting from what corner of a lecture room someone is asking a question during a meeting?<br><input type="radio"/> <b>H.31</b> telling how far away a bus or a truck is from the sound?<br><input checked="" type="radio"/> <b>H.32</b> telling where a human is when he screams or where a dog is when it barks loudly without having to look?                                                                                                                                                                                                                                                                                                                                                                                                    |                                                             |                                                       |
| b2303                                                                                                                                                                                                                                                                                                                                                                                                                                                                                                                                                                                                                                                                                                                                                                                                                                                                                                                                                                    | Lateralization of sound                                     | SSQ                                                   |
| <input type="radio"/> <b>H.33</b> detecting right away whether the person on your left or the person on your right starts talking, without having to look?                                                                                                                                                                                                                                                                                                                                                                                                                                                                                                                                                                                                                                                                                                                                                                                                               |                                                             |                                                       |
| b2304                                                                                                                                                                                                                                                                                                                                                                                                                                                                                                                                                                                                                                                                                                                                                                                                                                                                                                                                                                    | Speech discrimination                                       | SSQ, AIAHD                                            |
| <input type="radio"/> <b>H.38</b> understanding the presenter of the news on the radio or TV? (Also linked to b140/b1560/d115/d160/d310)<br><input type="radio"/> <b>H.39</b> understanding what someone is saying while the TV is on at the same time without turning the TV down? (Also linked to b140/b1560/d115/d160/e2501)<br><input checked="" type="radio"/> <b>H.40</b> understanding the presenter of the news on the radio or TV and understanding what someone is saying at the same time? (Also linked to b140/b1560/d115/d160/e2501)                                                                                                                                                                                                                                                                                                                                                                                                                        |                                                             |                                                       |
| b240                                                                                                                                                                                                                                                                                                                                                                                                                                                                                                                                                                                                                                                                                                                                                                                                                                                                                                                                                                     | Sensations associated with hearing and vestibular functions | NHANES, Alfakir questionnaire, Van Leeuwen Tool, OQUA |
| <input checked="" type="radio"/> <b>H.12</b> dizziness when standing or changing positions or walking or even when your head is still?<br><input checked="" type="radio"/> <b>H.13</b> your balance when standing or walking or changing position (e.g., being unsteady, off-balance)?<br><input type="radio"/> <b>H.18</b> ringing, beeping, roaring, or buzzing in your ears?<br><input checked="" type="radio"/> <b>H.19</b> a feeling of pressure or pressure balance in your ear ("popping" of the ear) in your daily life?<br><input type="radio"/> <b>H.20</b> irritation (e.g., itching) on or in your ear?                                                                                                                                                                                                                                                                                                                                                      |                                                             |                                                       |
| b250                                                                                                                                                                                                                                                                                                                                                                                                                                                                                                                                                                                                                                                                                                                                                                                                                                                                                                                                                                     | Taste function                                              | Van Leeuwen Tool, OQUA                                |
| <input type="radio"/> <b>H.10</b> taste loss?                                                                                                                                                                                                                                                                                                                                                                                                                                                                                                                                                                                                                                                                                                                                                                                                                                                                                                                            |                                                             |                                                       |
| b255                                                                                                                                                                                                                                                                                                                                                                                                                                                                                                                                                                                                                                                                                                                                                                                                                                                                                                                                                                     | Smell function                                              | Van Leeuwen Tool, OQUA                                |
| <input type="radio"/> <b>H.11</b> smell loss?                                                                                                                                                                                                                                                                                                                                                                                                                                                                                                                                                                                                                                                                                                                                                                                                                                                                                                                            |                                                             |                                                       |
| b280                                                                                                                                                                                                                                                                                                                                                                                                                                                                                                                                                                                                                                                                                                                                                                                                                                                                                                                                                                     | Sensation of pain                                           | WHS                                                   |
| <input checked="" type="radio"/> <b>H.14</b> pain in general?<br><input type="radio"/> <b>H.15</b> pain in your head and neck area? If you have problems, please specify the exact area in which you feel the pain. Which area?...                                                                                                                                                                                                                                                                                                                                                                                                                                                                                                                                                                                                                                                                                                                                       |                                                             |                                                       |
| b310                                                                                                                                                                                                                                                                                                                                                                                                                                                                                                                                                                                                                                                                                                                                                                                                                                                                                                                                                                     | Voice functions                                             | -                                                     |
| <input type="radio"/> <b>H.41</b> Do you have any health conditions causing speech impairment or producing sounds? (e.g., caused by ENT problems, stroke, head injury and other diseases)? If no, continue with question H49!<br><input type="radio"/> <b>H.42</b> If yes, have you been told by other people that you have problems with whistling or making other sounds (not speech) with your mouth? How big was the problem from the other persons' point of view?<br><input type="radio"/> <b>H.43</b> If yes, have you been told by others that you have problems with changing the pitch of sounds (other than speech), e.g., whistles? How big was the problem from the other persons' point of view?<br><input type="radio"/> <b>H.44</b> If yes, have you been told by others that you have problems with changing the volume of sounds (other than speech) that they make, such as whistling? How big was the problem from the other persons' point of view? |                                                             |                                                       |
| b320                                                                                                                                                                                                                                                                                                                                                                                                                                                                                                                                                                                                                                                                                                                                                                                                                                                                                                                                                                     | Articulation functions                                      | -                                                     |
| <input type="radio"/> <b>H.45</b> If yes, have you been told by other people that you have problems with pronunciation? How big was the problem from the other persons' point of view?<br><input type="radio"/> <b>H.46</b> If yes, have you been told by other people that you have problems with regulating the volume of your speech (too soft or too loud)? How big was the problem from the other persons' point of view?                                                                                                                                                                                                                                                                                                                                                                                                                                                                                                                                           |                                                             |                                                       |
| b330                                                                                                                                                                                                                                                                                                                                                                                                                                                                                                                                                                                                                                                                                                                                                                                                                                                                                                                                                                     | Fluency and rhythm of speech functions                      | -                                                     |
| <input type="radio"/> <b>H.47</b> If yes, have you been told by other people that you have problems with the speed of your speech? How big was the problem from the other persons' point of view?                                                                                                                                                                                                                                                                                                                                                                                                                                                                                                                                                                                                                                                                                                                                                                        |                                                             |                                                       |
| d330*                                                                                                                                                                                                                                                                                                                                                                                                                                                                                                                                                                                                                                                                                                                                                                                                                                                                                                                                                                    | Speaking                                                    | -                                                     |
| <input type="radio"/> <b>H.48</b> If yes, have you been told by other people that you have problems with telling stories or reporting on something? How big was the problem from the other persons' point of view? (*This question is linked to d330, but based on the concept, it's inserted here)                                                                                                                                                                                                                                                                                                                                                                                                                                                                                                                                                                                                                                                                      |                                                             |                                                       |
| <b>Activities and Participation</b>                                                                                                                                                                                                                                                                                                                                                                                                                                                                                                                                                                                                                                                                                                                                                                                                                                                                                                                                      |                                                             |                                                       |

| Do you have difficulty with ...                                                                                                                                                  |                                                  |                                               |
|----------------------------------------------------------------------------------------------------------------------------------------------------------------------------------|--------------------------------------------------|-----------------------------------------------|
| d110                                                                                                                                                                             | Watching                                         | -                                             |
| <b>H.90</b>                                                                                                                                                                      |                                                  |                                               |
| d115                                                                                                                                                                             | Listening                                        | Alfakir Questionnaire                         |
| <input type="radio"/> <b>H.74</b> listening to the television, radio, or music? (Also linked to b1560)                                                                           |                                                  |                                               |
| d160                                                                                                                                                                             | Focusing attention                               | -                                             |
| <b>H.3, H.4</b>                                                                                                                                                                  |                                                  |                                               |
| d220                                                                                                                                                                             | Undertaking multiple tasks                       | -                                             |
| <b>H.63, H.64, H.65, H.66</b>                                                                                                                                                    |                                                  |                                               |
| d240                                                                                                                                                                             | Handling stress and other psychological demands  | WHODAS 2.0, Van Leeuwen Tool                  |
| <input type="radio"/> <b>H.49</b> dealing with stressful situations? (Also linked to b126)                                                                                       |                                                  |                                               |
| d310                                                                                                                                                                             | Communicating with - receiving - spoken messages | Alfakir Questionnaire                         |
| <input checked="" type="radio"/> <b>H.57</b> understanding a statement or question during communication activity?                                                                |                                                  |                                               |
| d330                                                                                                                                                                             | Speaking                                         | -                                             |
| <b>H.48</b>                                                                                                                                                                      |                                                  |                                               |
| d3500                                                                                                                                                                            | Starting a conversation                          | -                                             |
| d3501                                                                                                                                                                            | Sustaining a conversation                        |                                               |
| d3502                                                                                                                                                                            | Ending a conversation                            |                                               |
| Merged with <b>H.67</b> and <b>H.68</b>                                                                                                                                          |                                                  |                                               |
| d3503                                                                                                                                                                            | Conversing with one person                       | SSQ, SAC, AIAHD                               |
| <input type="radio"/> <b>H.67</b> starting, continuing, or ending a conversation, or speaking with someone? (Merged with d3500, d3501, d3502)                                    |                                                  |                                               |
| <input type="radio"/> <b>H.69</b> carrying on a conversation with someone during a crowded meeting? (Also linked to b140/d160/e2501)                                             |                                                  |                                               |
| <input type="radio"/> <b>H.70</b> carrying on a conversation with somebody in a bus or car? (Also linked to b140/d160/e2501)                                                     |                                                  |                                               |
| <input type="radio"/> <b>H.73</b> telling what someone is saying when the conversation switches from one person to another? (Also linked to b140/d160/e2501)                     |                                                  |                                               |
| d3504                                                                                                                                                                            | Conversing with many people                      | WHODAS 2.0, Alfakir Questionnaire, SAC, AIAHD |
| <input type="radio"/> <b>H.68</b> starting, continuing, or ending a conversation, or speaking with several people in a group? (Merged with d3500, d3501, d3502)                  |                                                  |                                               |
| <input type="radio"/> <b>H.71</b> following a conversation between five people in a busy restaurant while you can see everyone? (Also linked to b140/d160/e2501)                 |                                                  |                                               |
| d355                                                                                                                                                                             | Discussion                                       | -                                             |
| <input type="radio"/> <b>H.56</b> starting, continuing, or ending an argument or debate with one person or many people?                                                          |                                                  |                                               |
| d360                                                                                                                                                                             | Using communication devices and techniques       | AIAHD                                         |
| <input type="radio"/> <b>H.62</b> performing communication techniques such as lip-reading? (Also linked to e240)                                                                 |                                                  |                                               |
| <input type="radio"/> <b>H.72</b> carrying a phone call in a quiet room?                                                                                                         |                                                  |                                               |
| d710                                                                                                                                                                             | Basic interpersonal interactions                 | -                                             |
| <input type="radio"/> <b>H.50</b> interacting with people in a socially appropriate manner (e.g. regulating emotions, controlling verbal and physical aggression)?               |                                                  |                                               |
| d720                                                                                                                                                                             | Complex interpersonal interactions               | -                                             |
| <input type="radio"/> <b>H.61</b> starting and continuing relationships in a socially appropriate manner (e.g. regulating emotions, controlling verbal and physical aggression)? |                                                  |                                               |
| d730                                                                                                                                                                             | Relating with strangers                          | WHODAS 2.0                                    |
| <input type="radio"/> <b>H.52</b> dealing with people you do not know?                                                                                                           |                                                  |                                               |

|                                                                                                                                                                                                                                                                                                                                                                                                                                                                                                                                       |                                                                                      |                                         |
|---------------------------------------------------------------------------------------------------------------------------------------------------------------------------------------------------------------------------------------------------------------------------------------------------------------------------------------------------------------------------------------------------------------------------------------------------------------------------------------------------------------------------------------|--------------------------------------------------------------------------------------|-----------------------------------------|
| d740                                                                                                                                                                                                                                                                                                                                                                                                                                                                                                                                  | Formal relationships                                                                 | -                                       |
| <input type="radio"/> H.53 starting and continuing formal relationships with people in authority (e.g. employers, professionals or service providers)?                                                                                                                                                                                                                                                                                                                                                                                |                                                                                      |                                         |
| d750                                                                                                                                                                                                                                                                                                                                                                                                                                                                                                                                  | Informal social relationships                                                        | WHODAS 2.0, Alfakir Questionnaire       |
| <input type="radio"/> H.51 socializing with people living in your community (e.g. Classmates, co-workers)?<br><input type="radio"/> H.54 socializing with your family or friends?<br><input type="radio"/> H.55 making new friends? (Also linked to d720)                                                                                                                                                                                                                                                                             |                                                                                      |                                         |
| d760                                                                                                                                                                                                                                                                                                                                                                                                                                                                                                                                  | Family relationships                                                                 | Alfakir Questionnaire, Van Leeuwen Tool |
| <input type="radio"/> H.58 maintaining relationships with your immediate family members (parents, partner, children)?                                                                                                                                                                                                                                                                                                                                                                                                                 |                                                                                      |                                         |
| d820                                                                                                                                                                                                                                                                                                                                                                                                                                                                                                                                  | School education                                                                     | WHODAS 2.0                              |
| d830                                                                                                                                                                                                                                                                                                                                                                                                                                                                                                                                  | Higher education                                                                     |                                         |
| d850                                                                                                                                                                                                                                                                                                                                                                                                                                                                                                                                  | Remunerative employment                                                              |                                         |
| d855                                                                                                                                                                                                                                                                                                                                                                                                                                                                                                                                  | Non-remunerative employment                                                          |                                         |
| <b>Note:</b> Answer the questions H.63 – H.66 with regards to the task you are assigned at your school, university, paid or unpaid workplace.<br><input type="radio"/> H.63 your day-to-day occupation/tasks? (Also linked to d220)<br><input type="radio"/> H.64 doing your most important tasks well? (Also linked to d220)<br><input type="radio"/> H.65 getting done all the tasks that you needed to do? (Also linked to d220)<br><input type="radio"/> H.66 getting your tasks done as quickly as needed? (Also linked to d220) |                                                                                      |                                         |
| d910                                                                                                                                                                                                                                                                                                                                                                                                                                                                                                                                  | Community life                                                                       | WHODAS 2.0                              |
| <input type="radio"/> H.59 joining in community activities (for example, festivities, religious or other activities) in the same way as anyone else can?                                                                                                                                                                                                                                                                                                                                                                              |                                                                                      |                                         |
| d920                                                                                                                                                                                                                                                                                                                                                                                                                                                                                                                                  | Recreation and leisure                                                               | -                                       |
| <input type="radio"/> H.60 engaging in any hobby or pleasurable activity (such as games, sports, or going to cinema)?                                                                                                                                                                                                                                                                                                                                                                                                                 |                                                                                      |                                         |
| <b>Environmental Factors</b>                                                                                                                                                                                                                                                                                                                                                                                                                                                                                                          |                                                                                      |                                         |
| <b>I: Usefulness: What is the extent to which you rate the overall usefulness of ...?</b><br><b>II: Support: What is the extent to which you rate the general support received from ...?</b><br><b>III: Barrier: What is the extent to which the ... can be considered a barrier?</b>                                                                                                                                                                                                                                                 |                                                                                      |                                         |
| e125                                                                                                                                                                                                                                                                                                                                                                                                                                                                                                                                  | Products and technology for communication                                            | Alfakir questionnaire, Van Leeuwen Tool |
| <b>Please answer questions H.87 to H.90 only if you have hearing aids!</b><br><input type="radio"/> H.87 (I) your hearing aid in your normal daily routines?<br><input type="radio"/> H.88 (I) your hearing aid during listening-conversation activities?<br><input type="radio"/> H.89 (I) your hearing aid while using a telephone or cellphone?<br><input type="radio"/> H.90 (I) your hearing aid while watching TV? (Also linked to d110)                                                                                        |                                                                                      |                                         |
| e150                                                                                                                                                                                                                                                                                                                                                                                                                                                                                                                                  | Design construction and building products and technology of buildings for public use | -                                       |
| <input type="radio"/> H.81 (III) design and construction of your workplace/task place                                                                                                                                                                                                                                                                                                                                                                                                                                                 |                                                                                      |                                         |
| e240                                                                                                                                                                                                                                                                                                                                                                                                                                                                                                                                  | Light                                                                                | -                                       |
| <input type="radio"/> H.82 (III) darkness or the absence of light ... (e.g. in lipreading)                                                                                                                                                                                                                                                                                                                                                                                                                                            |                                                                                      |                                         |
| e2500                                                                                                                                                                                                                                                                                                                                                                                                                                                                                                                                 | Sound intensity                                                                      | -                                       |
| <input type="radio"/> H.83 (III) low volume of speech (Also linked to b1560)                                                                                                                                                                                                                                                                                                                                                                                                                                                          |                                                                                      |                                         |
| e2501                                                                                                                                                                                                                                                                                                                                                                                                                                                                                                                                 | Sound quality                                                                        | SAC, Alfakir questionnaire              |

|                                                                                                                                                                                                                                                                                                        |                                                  |                                         |
|--------------------------------------------------------------------------------------------------------------------------------------------------------------------------------------------------------------------------------------------------------------------------------------------------------|--------------------------------------------------|-----------------------------------------|
| <input type="radio"/> <b>H.84</b> (III) background noise (Also linked to b1560/b2304)<br><input type="radio"/> <b>H.85</b> (III) reverberant or echoing environment (e.g., train station) (Also linked to b1560/b2304)<br><input type="radio"/> <b>H.86</b> (III) unclear sound (Also linked to b1560) |                                                  |                                         |
| e310                                                                                                                                                                                                                                                                                                   | Immediate family                                 | Alfakir questionnaire, Van Leeuwen Tool |
| e320                                                                                                                                                                                                                                                                                                   | Friends                                          |                                         |
| <input type="radio"/> <b>H.77</b> (II) your close family members and friends in your daily functioning especially during listening-conversation activities?                                                                                                                                            |                                                  |                                         |
| e355                                                                                                                                                                                                                                                                                                   | Health professionals                             | Van Leeuwen Tool                        |
| <input type="radio"/> <b>H.79</b> (II) your most important healthcare professional(s)?                                                                                                                                                                                                                 |                                                  |                                         |
| e410                                                                                                                                                                                                                                                                                                   | Individual attitudes of immediate family members | -                                       |
| e420                                                                                                                                                                                                                                                                                                   | Individual attitude of friends                   |                                         |
| <input type="radio"/> <b>H.76</b> (II) your close family members and friends (such as providing emotional and social support, encouragement and so on)?                                                                                                                                                |                                                  |                                         |
| e460                                                                                                                                                                                                                                                                                                   | Societal attitudes                               | SAC, Van Leeuwen Tool                   |
| <input checked="" type="radio"/> <b>H.75</b> (II) people in your society (such as providing emotional and social support, encouragement etc.)?                                                                                                                                                         |                                                  |                                         |
| e535                                                                                                                                                                                                                                                                                                   | Communication services, systems and policies     | -                                       |
| <input type="radio"/> <b>H.80</b> (I) the communication services and systems you use daily such as telephone, cellphone, speaker, bluetooth connection and so on?                                                                                                                                      |                                                  |                                         |
| e580                                                                                                                                                                                                                                                                                                   | Health services, systems and policies            | -                                       |
| <input type="radio"/> <b>H.78</b> (II) the main health services and systems offered in relation to your hearing aids and medical services (e.g. ear specialist)?                                                                                                                                       |                                                  |                                         |

Table 2: The references used in table 1 illustrating the 13 resources used in the design of the *HEAR-COMMAND Tool*

| <b>Questionnaire</b>                                                                              | <b>Abbreviation</b>       | <b>Developer(s)</b>                                                      | <b>Reference</b> |
|---------------------------------------------------------------------------------------------------|---------------------------|--------------------------------------------------------------------------|------------------|
| National Health And Nutrition Examination Survey-Audiometry                                       | NHANES                    | United States Centers for Disease Control and Prevention (CDC) 2007-2008 | 31               |
| World Health Organization (WHO) Disability Assessment Schedule                                    | WHODAS 2.0                | Üstün et al. and WHO 2010                                                | 32               |
| World Health Survey Individual Questionnaire                                                      | WHS                       | WHO 2002                                                                 | 33               |
| The Speech, Spatial and Qualities of hearing scale                                                | SSQ                       | Gatehouse & Noble 2004                                                   | 34               |
| Dizziness Handicap Inventory                                                                      | DHI                       | Jacobson et al. 1990                                                     | 35               |
| Self-Assessment of Communication                                                                  | SAC                       | Schow & Nerbonne 1982                                                    | 36               |
| Self-Assessments ICF Core Sets for Hearing Loss Questionnaire                                     | Alfakir Questionnaire     | Alfakir & Holmes 2017                                                    | 23               |
| An ICF-Based e-Intake Tool in Clinical Otology and Audiology Practice                             | van Leeuwen e-Intake Tool | van Leeuwen et al. 2020a                                                 | 24               |
| The ICF checklist Version 2.1a                                                                    | ICF checklist             | WHO 2007                                                                 | 37               |
| Otology Questionnaire Amsterdam                                                                   | OQUA                      | Bruinewoud et al. 2018                                                   | 38               |
| Hearing, Lifestyle and Health Questionnaire (Fragebogen Hören, Lebensgewohnheiten und Gesundheit) | HLHQ                      | Hörzentrum Oldenburg gGmbH, Gieseler et al., 2017                        | 39               |
| Ohrstrom HL medical interview                                                                     | OHL                       | Hörzentrum Oldenburg gGmbH, gathered in Afghah, et al. 2022              | 40               |
| Amsterdam Inventory for Auditory Disability and Handicap                                          | AIADH                     | Kramer et al. 1995                                                       | 41               |

- [23] Alfakir, R., & Holmes, A. E. (2017). Development and Validation of a Questionnaire Measuring Functioning Abilities of Older Adults Living with Hearing Disability: Implications for Audiologic Rehabilitation. *Journal of the Academy of Rehabilitative Audiology*, 50.
- [24] van Leeuwen, L. M., Pronk, M., Merkus, P., Goverts, S. T., Terwee, C. B., & Kramer, S. E. (2020a). Operationalization of the Brief ICF core set for hearing loss: An ICF-Based e-intake tool in clinical otology and audiology practice. *Ear and hearing*, 41(6), 1533. DOI: 10.1097/AUD.0000000000000867.
- [31] Centers for Disease Control and Prevention (CDC). National Center for Health Statistics (NCHS). National Health And Nutrition Examination Survey questionnaire (NHANES), Hyattsville, MD, U.S., Department of Health and Human Services, Centers for Disease Control and Prevention, 2007-2008. <https://www.cdc.gov/nchs/nhanes/index.htm>. (Accessed: May 21, 2022).
- [32] Üstün, T. B., Kostanjsek, N., Chatterji, S., & Rehm, J. (Eds.). (2010). *Measuring health and disability: Manual for WHO disability assessment schedule WHODAS 2.0*. World Health Organization.
- [33] World Health Organization (WHO). World Health Survey (WHS) 2002; Individual questionnaire. <https://apps.who.int/healthinfo/systems/surveydata/index.php/catalog/whs/about>. (Accessed: May 21, 2022).
- [34] Gatehouse, S., & Noble, W. (2004). The speech, spatial and qualities of hearing scale (SSQ). *International journal of audiology*, 43(2), 85-99. <https://doi.org/10.1080/14992020400050014>.
- [35] Jacobson, G. P., & Newman, C. W. (1990). The development of the dizziness handicap inventory. *Archives of Otolaryngology–Head & Neck Surgery*, 116(4), 424-427. DOI: 10.1001/archotol.1990.01870040046011.
- [36] Schow, R. L., & Nerbonne, M. A. (1982). Communication screening profile: Use with elderly clients. *Ear and Hearing*, 3(3), 135-147.
- [37] World Health Organization (WHO). (2007). ICF Checklist version 2.1 a, clinician form. <https://www.who.int/publications/m/item/icf-checklist>. (Accessed: May 21, 2022).
- [38] Bruinewoud, E. M., Kraak, J. T., van Leeuwen, L. M., Kramer, S. E., & Merkus, P. (2018). The Otology Questionnaire Amsterdam: a generic patient reported outcome measure about the severity and impact of ear complaints. A cross-sectional study on the development of this questionnaire. *Clinical Otolaryngology*, 43(1), 240-248. DOI: 10.1111/coa.12950
- [39] Gieseler, A., Tahden, M. A., Thiel, C. M., Wagener, K. C., Meis, M., & Colonius, H. (2017). Auditory and non-auditory contributions for unaided speech recognition in noise as a function of hearing aid use. *Frontiers in psychology*, 8, 219. <https://doi.org/10.3389/fpsyg.2017.00219>.
- [40] Afghah, T., Schütze, J., Meis, M., Kollmeier, B., & Wagener, K. C. (2022). Conformities and gaps of clinical audiological data with the international classification of functioning disability and health core sets for hearing loss. *International Journal of Audiology*, 1-10. <https://doi.org/10.1080/14992027.2022.2078433>.
- [41] Kramer, S. E., Kapteyn, T. S., Festen, J. M., & Tobi, H. (1995). Factors in subjective hearing disability. *Audiology*, 34(6), 311-320.

Table 3: The modifications applied to the beta version after data collection to create the revised version of the *HEAR-COMMAND Tool*

| Nr.           | Beta version                                                                                                                                                                                                                                                                                                                                                                                                               | Revised version                                                                                                                                                                                                                                    | Note                                                                                                                                                                                  |
|---------------|----------------------------------------------------------------------------------------------------------------------------------------------------------------------------------------------------------------------------------------------------------------------------------------------------------------------------------------------------------------------------------------------------------------------------|----------------------------------------------------------------------------------------------------------------------------------------------------------------------------------------------------------------------------------------------------|---------------------------------------------------------------------------------------------------------------------------------------------------------------------------------------|
| A.14          | Examples include noise from power tools, lawn mowers, farm machinery, cars, trucks, motorcycles, motor boats, or loud music                                                                                                                                                                                                                                                                                                | For example engine noise or loud music                                                                                                                                                                                                             | The participants claimed that the question is clear and that providing 8 examples is unnecessary.                                                                                     |
| A.17          | If yes, select the main causes:<br>2 Noise-induced hearing loss<br>3 Music event                                                                                                                                                                                                                                                                                                                                           | 2 Noise-induced hearing loss (excluding music events or concerts)<br>3 Noise-induced hearing loss caused after music events or concerts                                                                                                            | The participants claimed that the response option “Noise-induced hearing loss” can potentially include a music event, therefore there is an overlap between the two response options. |
| A.28          | 1 Behind The Ear (BTE)<br>2 In-The-Ear (ITE)<br>3 In-The-Canal (ITC)<br>4 Invisible In Canal (IIC)<br>5 Completely In Canal (CIC)<br>6 Mini Canal (MC)<br>7 Receiver In Canal (RIC)<br>8 Microtube<br>9 Cochlear Implant (CI)<br>10 Contralateral Routing Of Signals (CROS)<br>11 Bilateral microphones with Contralateral Routing Of Signal (BiCROS)<br>12 Bone-Anchored Hearing Aid (BAHA)<br>13 Others (Please specify) | 1 Hearing aid (including Behind-The Ear, In-The-Ear, Receiver In Canal, Bone- Anchored Hearing Aid; BAHA)<br>2 Cochlear Implant (CI)<br>3 Others (Please specify)                                                                                  | The collected data showed that many of the options were not chosen in any country, so the response options were limited to hearing aid.                                               |
| H.01          | Do you have a problem with adjusting (correcting or modifying or compromising) your attitude or mood during a stressful or unexpected situation?                                                                                                                                                                                                                                                                           | Do you have a problem with changing your attitude or mood when you are in an unpredictable or stressful situation?                                                                                                                                 | The participants claimed that the words “correcting or modifying or compromising” were found to be unclear and lengthy.                                                               |
| H.05 and H.06 | Do you have a problem with remembering things or recalling new information?                                                                                                                                                                                                                                                                                                                                                | Do you have a problem with remembering things?<br>Do you have a problem with recalling new information?                                                                                                                                            | The participants claimed that they have a different degree of impairment/problem for the combined concepts.                                                                           |
| H.12 and H.13 | Do you have a problem with dizziness?<br>Do you have a problem with loss of balance?                                                                                                                                                                                                                                                                                                                                       | Do you have a problem with dizziness when standing or changing positions or walking or even when your head is still?<br>Do you have a problem with your balance when standing or walking or changing position (e.g., being unsteady, off-balance)? | The participants claimed that the differentiation of the terms “dizziness” and “loss of balance” is difficult and unclear. More explanation is needed.                                |



|                            |                                                                                                                                                                                                                              |                                                                                                                                                                                                                                                                 |                                                                                                                                                                                                                       |
|----------------------------|------------------------------------------------------------------------------------------------------------------------------------------------------------------------------------------------------------------------------|-----------------------------------------------------------------------------------------------------------------------------------------------------------------------------------------------------------------------------------------------------------------|-----------------------------------------------------------------------------------------------------------------------------------------------------------------------------------------------------------------------|
| <b>H.16 and H.17</b>       | Do you have a problem with understanding a spoken or written message in your language?<br>Do you have a problem with producing a meaningful spoken or written message in your language?                                      | Do you have a problem with understanding the meaning of a message in your language?<br>Do you have a problem with producing a meaningful message in your language?                                                                                              | The questions were asked to target the cognitive aspect of understanding a language. The questions were linked to “Mental functions of language” (b167). Using the words “spoken or written” misled the participants. |
| <b>H.19</b>                | a feeling of pressure or pressure balance in your ear (“popping” of the ear)?                                                                                                                                                | ... (“popping” of the ear) in your daily life?”                                                                                                                                                                                                                 | The participants claimed that they were not certain about the targeted time period.                                                                                                                                   |
| <b>H.21 and H.22</b>       | Do you have a problem with distinguishing the tone or pitch of sounds?                                                                                                                                                       | Do you have a problem with distinguishing the pitch of sounds?<br>Do you have a problem with distinguishing the tone of sounds?                                                                                                                                 | The participants claimed that they have a different degree of impairment/problem for the combined concepts.                                                                                                           |
| <b>H.32</b>                | Do you have a problem with telling where a dog is when it barks loudly from its sound and without having to look?                                                                                                            | Do you have a problem with telling where a human is when he screams or where a dog is when it barks loudly without having to look?                                                                                                                              | The participants recommended using an additional example to clarify the target meaning.                                                                                                                               |
| <b>H.35, H.36 and H.37</b> | Do you have a problem with understanding the speech of someone you know (i.e., spouse, partner, child, sibling, or close friend, health care provider, etc.) over a distance/in a quiet environment/ in a noisy environment? | Do you have a problem with understanding the speech of someone you know (your close family members and friends) over distance of two or more meters?                                                                                                            | The participants claimed that the aimed “Distance” was not clear.<br>The examples were not necessary.                                                                                                                 |
| <b>Prior to H.63</b>       | Note: When answering the following four questions, do not think of private activities, but of more public tasks, such as education, work or volunteering.                                                                    | Note: Answer the questions 63 - 66 with regards to the task you are assigned at your school, university, paid or unpaid workplace.                                                                                                                              | The participants claimed that the guidance sentence needed more clarification.                                                                                                                                        |
| <b>H.75 and H.76</b>       | What is the extent to which you rate the support received from people in your society/family members (attitude, opinion, and beliefs)?                                                                                       | What is the extent to which you rate the support received from people in your society/family members (such as providing emotional and social support, encouragement etc.)?                                                                                      | The participants claimed that the terms “attitude, opinion, and beliefs” were found to be too general, and instead providing examples is more helpful.                                                                |
| <b>H.76 and H.77</b>       | close family members                                                                                                                                                                                                         | close family members and friends                                                                                                                                                                                                                                | The participants who do not live with family members claimed that the question is meaningful if it’s asked about a close friend.                                                                                      |
| <b>H.80</b>                | What is the extent to which you rate the usefulness of the communication services and systems you use daily such as telephone and cellphone?                                                                                 | What is the extent to which you rate the usefulness of the communication services and systems you use daily such as telephone, cellphone, speaker, Bluetooth connection and so on?                                                                              | The participants claimed that more examples of the communication services and systems were needed.                                                                                                                    |
| <b>H.81 to H.86</b>        | Do you experience a barrier with ...?                                                                                                                                                                                        | Note: When answering the questions 81 - 86, think of a barrier as a hindrance, added difficulty, and restriction. Answer these questions considering the barrier that can affect your daily functioning/tasks (e.g., during listening-conversation activities). | As the participants found this terminology unclear or uncommon, the item formulation was changed in all of the questions with barrier terms.                                                                          |

|             |                                                                                                                  |                                                                                                                       |                                                                                                               |
|-------------|------------------------------------------------------------------------------------------------------------------|-----------------------------------------------------------------------------------------------------------------------|---------------------------------------------------------------------------------------------------------------|
|             |                                                                                                                  | What is the extent to which ... can be considered a barrier?                                                          |                                                                                                               |
| <b>H.82</b> | Do you experience a barrier with the absence of light in daily functioning (e.g. in lip-reading)?                | What is the extent to which the darkness or the absence of light can be considered a barrier (e.g., in lip-reading)?  | Adding the word “darkness” helps better understand the term “the absence of light”.                           |
| <b>H.85</b> | Do you experience a barrier with the reverberant (echoing) environment during listening-conversation activities? | What is the extent to which the reverberant or echoing environment (e.g., train station) can be considered a barrier? | The participants claimed that adding an example of an echoing environment would further clarify the question. |
| <b>H.86</b> | Do you experience a barrier or restriction when everyday sounds are not clear?                                   | What is the extent to which the unclear sound can be considered a barrier?                                            | The participants claimed that the term “everyday sound” was not clear.                                        |
